# Supplementary material
Source: HighWire-hosted journal article supplement (https://erj.ersjournals.com/content/59/4/2102636)

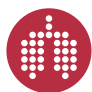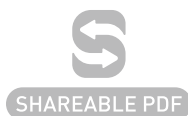

# Addition of bacterial filter alters positive airway pressure and non-invasive ventilation performances

Claudio Rabec <sup>1,2,3</sup>, Emeline Fresnel <sup>4</sup>, Yann Rétory <sup>5</sup>, Kaixian Zhu <sup>5</sup>, Karima Joly <sup>2</sup>, Adrien Kerfourn <sup>4</sup>, Benjamin Dudoignon <sup>6</sup>, Alexis Mendoza <sup>3</sup>, Antoine Cuvelier <sup>3,7</sup>, Jean-François Muir <sup>2</sup>, Boris Melloni <sup>2,8</sup>, Jean-François Chabot <sup>2,9</sup>, Jésus Gonzalez-Bermejo <sup>3,10,11</sup> and Maxime Patout <sup>3,6,11</sup>

<sup>1</sup>Pulmonary Dept and Respiratory Critical Care Unit, University Hospital Dijon, Dijon, France. <sup>2</sup>Fédération ANTADIR, Paris, France. <sup>3</sup>Groupe Assistance Ventilatoire et O<sub>2</sub> (GAVO<sub>2</sub>), Société de Pneumologie de Langue Française, Paris, France. <sup>4</sup>Kernel Biomedical, Bois-Guillaume, France. <sup>5</sup>Centre EXPLOR, Air Liquide Healthcare, Gentilly, France. <sup>6</sup>AP-HP, Groupe Hospitalier Universitaire APHP-Sorbonne Université, site Pitié-Salpêtrière, Service des Pathologies du Sommeil (Département R3S), Paris, France. <sup>7</sup>Normandie Univ, UNIRouen, EA3830-GRHV, Institute for Research and Innovation in Biomedicine (IRIB), Rouen, France. <sup>8</sup>Pulmonary Dept, University Hospital Limoges, Limoges, France. <sup>9</sup>Département de Pneumologie, Université de Lorraine, CHU de Nancy, Vandœuvre-lès-Nancy, France. <sup>10</sup>AP-HP, Groupe Hospitalier Universitaire APHP-Sorbonne Université, site Pitié-Salpêtrière, Service de Pneumologie, Médecine Intensive et Réanimation (Département R3S), Paris, France. <sup>11</sup>Sorbonne Université, INSERM, UMRS1158 Neurophysiologie Respiratoire Expérimentale et Clinique, Paris, France.

Corresponding author: Maxime Patout ([maxime.patout@aphp.fr](mailto:maxime.patout@aphp.fr))

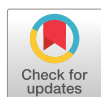

Shareable abstract (@ERSpublications)

**The recommendation to add a bacterial filter on home positive pressure devices has significant negative impact on their performances and precludes auto-titrating positive airway pressure to function. These data suggest to not follow such recommendation.** <https://bit.ly/31YrWyo>

**Cite this article as:** Rabec C, Fresnel E, Rétory Y, *et al.* Addition of bacterial filter alters positive airway pressure and non-invasive ventilation performances. *Eur Respir J* 2022; 59: 2102636 [DOI: 10.1183/13993003.02636-2021].

This single-page version can be shared freely online.

Copyright ©The authors 2022.

This version is distributed under the terms of the Creative Commons Attribution Non-Commercial Licence 4.0. For commercial reproduction rights and permissions contact [permissions@ersnet.org](mailto:permissions@ersnet.org)

Received: 23 Sept 2021  
Accepted: 5 Jan 2022

*To the Editor:*

Recently, one manufacturer of home ventilators issued an alert regarding the potential risk of serious injury related to the use of some of their positive airway pressure (PAP) and non-invasive ventilation (NIV) devices [1]. The risk is caused by the polyurethane foam used in their ventilators. In some cases, the foam broke into the blower and could have been inhaled by patients. The manufacturer and some healthcare regulatory agencies advocated, as a temporary solution, to modify PAP and NIV circuits by adding an inline bacterial filter in order to reduce the risk of inhalation [2]. However, changing ventilator circuits can alter ventilator performances during PAP and NIV [3].

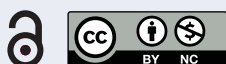

Supplement: inline-supplementary-material-1 [file inline-supplementary-material-1.pdf]
